# Supplementary material for: Dermatologic events from EGFR inhibitors: the issue of the missing patient voice
Source: Springer Nature journal article supplement (doi:10.1007/s00520-016-3419-4), 2016-10-07
Supplement: MOESM1 [file 10831742]

**Supplemental Figure 1** Example of a physician-patient communication regarding skin toxicities (patient brochure)


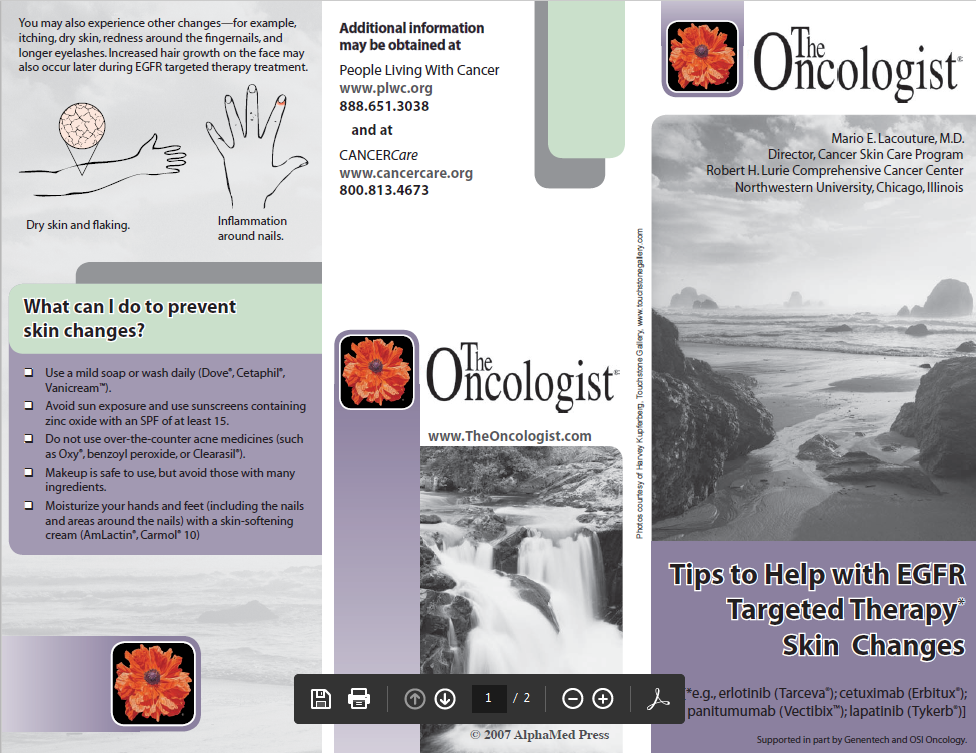


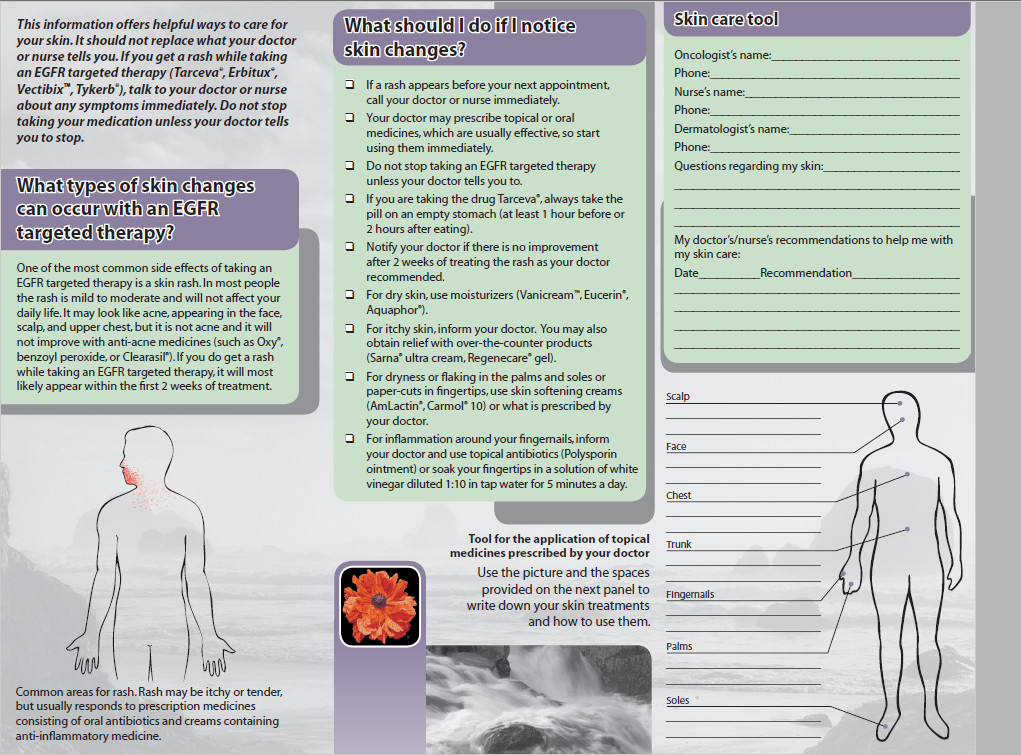


Lynch TJ Jr, Kim ES, Eaby B, Garey J, West DP, Lacouture ME. Epidermal growth factor receptor inhibitor-associated cutaneous toxicities: an evolving paradigm in clinical management. *Oncologist*. 2007;12(5):610-621, patient brochure. http://theoncologist.alphamedpress.org/content/suppl /2007/08/27/12.5.610.DC1/Patient_Brochure.pdf. Accessed July 21, 2016.
